# Supplementary material for: Vapor treatment of nanocrystalline WO3 photoanodes for enhanced photoelectrochemical performance in the decomposition of water
Source: Royal Society of Chemistry journal article supplement (doi:10.1039/c1jm14785d), 2011-01-01
Supplement: c1jm14785d.pdf [file c1jm14785d.pdf]

# Electronic Supplementary Information

## Vapor Treatment of Nanocrystalline WO<sub>3</sub> Photoanodes for Enhanced Photoelectrochemical Performance in the Decomposition of Water

Po-Tsung Hsiao,<sup>1</sup> Liang-Che Chen,<sup>1</sup> Tzung-Luen Li,<sup>1</sup> and Hsisheng Teng<sup>1,2,\*</sup>

<sup>1</sup>Department of Chemical Engineering and Research Center for Energy Technology and Strategy,  
National Cheng Kung University, Tainan 70101, Taiwan

<sup>2</sup>Center for Micro/Nano Science and Technology, National Cheng Kung University,  
Tainan 70101, Taiwan

\* To whom correspondence should be addressed.

(E-mail): [hteng@mail.ncku.edu.tw](mailto:hteng@mail.ncku.edu.tw) (Fax): 886-6-2344496

**Figure S1.** Absorption edge regions of the W L<sub>3</sub>-edge XANES spectra of the WO<sub>3</sub> films

**Figure S2.** Second derivatives of the W L<sub>3</sub>-edge XANES spectra of the WO<sub>3</sub> films

**Figure S3.** W L<sub>3</sub>-edge EXAFS oscillations (k wave functions) of the WO<sub>3</sub> films. The dashed line curves denote the best fitting of the spectra.

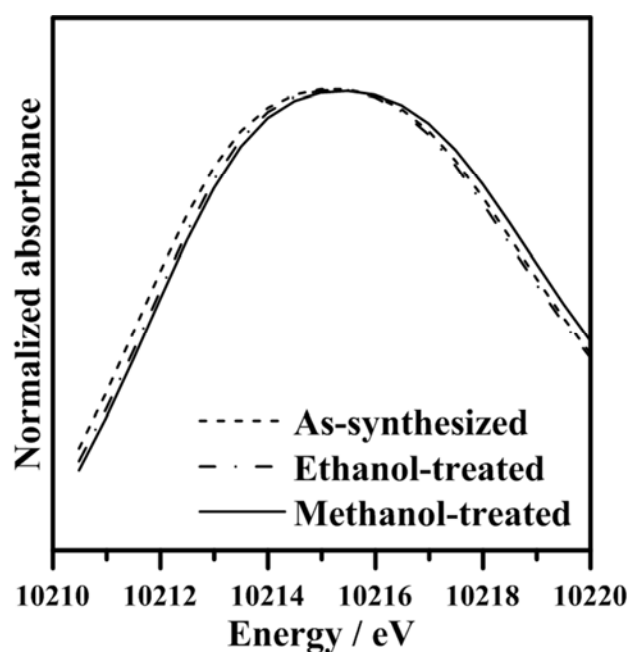

**Figure S1.** Absorption edge regions of the W L<sub>3</sub>-edge XANES spectra of the WO<sub>3</sub> films

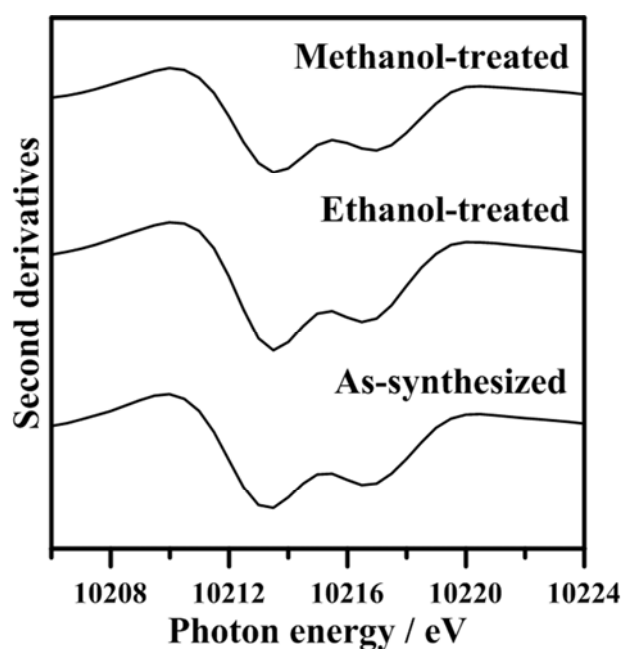

**Figure S2.** Second derivatives of the W L<sub>3</sub>-edge XANES spectra of the WO<sub>3</sub> films

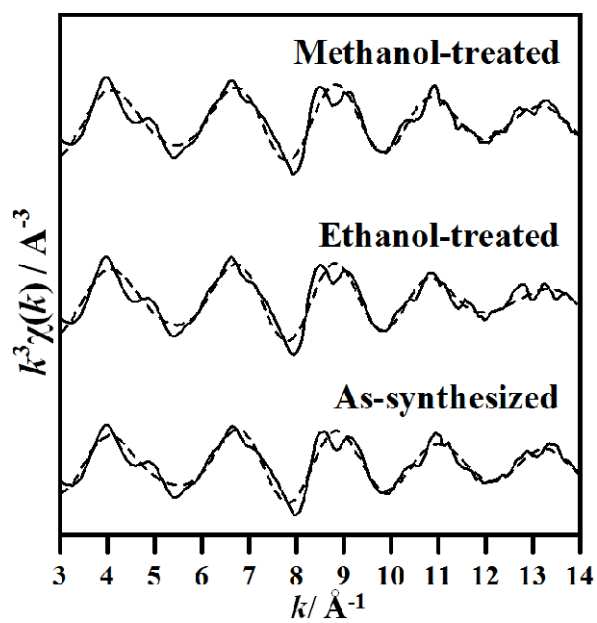

**Figure S3.** The W  $L_3$ -edge EXAFS oscillations (the  $k$  wave functions) of the  $\text{WO}_3$  films. The dashed line curves denote the best fitting of the spectra.
